# Supplementary material
Source: publisher figshare collection journal article supplement (https://gsapubs.figshare.com/ndownloader/files/23296388)
Supplement: Supplementary file 1 [file 23296388]

## **SUPPLEMENTAL MATERIAL**

### **FAULT KINEMATICS**

#### **Methods**

Structural observations and fault kinematic data were collected from fault planes in outcrop (e.g. Fig. 4H, I) where fault-slip indicators (slickenlines or mullions) were preserved (e.g. Fig. 4J, K). 132 fault-slip indicators were measured within all non-Quaternary map units. Each fault-slip measurement consists of the strike/dip of the fault plane, rake of fault slip indicator, and sense of shear. A reliable shear sense indicator was absent for ~80% of the measured striae. Thus, a shear sense direction was systematically assigned to each fault kinematic datum based on models of predictable transtensional structures (e.g. Withjack and Jamison, 1986) formed from dextral oblique extension (e.g. a west-dipping fault with dip-slip slickenlines is assigned an extensional, not compressional, shear-sense indicator).

#### **Analysis**

For this kinematic analysis, slickenlines are assumed to form in the direction of the maximum resolved shear stress on a fault plane (Wallace, 1951; Bott, 1959). Thus, the paleo-directions of the most compressive and least compressive principal stresses on that fault form components of the orientation of the fault slickenline or mullion datum. Together these data, in the context of the orientation of the fault plane on which they are measured, yield a set of principal strain directions. If these represent infinitesimal strain (i.e. small-offset faults that have not been subsequently rotated) the strain axes should be representative of paleo-stress principal axes. Principal paleo-stress axes were determined using FaultKin v.4.3.5 software (Marrett and Allmendinger, 1990; Allmendinger et al., 2012), which utilizes the right dihedral geometrical method of Angelier and Mechler (1977) and Pfiffner and Burkhard (1987).

Variable amounts of clockwise vertical-axis rotation of fault blocks have occurred across the study area. This rotation greatly complicates the analysis, as faults may have slipped at an orientation different than that measured in outcrop. In our analysis we assume that the faults measured were formed prior to rotation. All fault kinematic data were thus rotated counter-clockwise about a vertical-axis by the amount of rotation either determined by the paleomagnetic results of this study (up to 53°), or predicted from strain compatibility with adjacent blocks.

#### **Results**

Fault kinematic data are highly variable and do not show a consistent relationship between fault dip and rake or fault strike and rake (Fig. DR1). This suggests that many faults have been rotated since their formation, complicating kinematic analysis. Overall the fault kinematic data are consistent with transtensional deformation of the area. Fault kinematic indicators measured in pre-12.5 Ma rocks (Fig. DR2A; n=89) are generally ignored in this analysis as they may record older, pre-rift episodes of deformation. Fault kinematic indicators measured in 12.5 - 0 Ma rocks (n=43) reflect all Gulf of California deformation, and display WSW-directed slightly oblique extension (T-axis azimuth 254°) with a near-vertical  $\sigma_1$  principal stress (Fig. DR2B).

To test for a change in paleo-stress orientation with time (cf. Angelier et al., 1981), the well-dated stratigraphy was used as a chronologic filter as various periods of time were compared for similar or dissimilar paleo-stress axis orientations. Fault kinematic indicators (n=20) measured in early proto-Gulf rocks (12.5 to 11.5 Ma), which integrate all subsequent Gulf deformation, display a SW-NE slightly oblique extension direction (T-axis azimuth 232°) with a near-vertical  $\sigma_1$  principal stress (Fig. DR2C). In latest proto-Gulf rocks (7 to ~6 Ma), fault kinematic indicators (n=23) suggest an approximate E-W slightly oblique extension direction (T-

axis azimuth  $263^{\circ}$ ), again with a near-vertical  $\sigma_1$  principal stress (Fig. DR2D). Although the paleo-stress results from the fault kinematic dataset appear to distinguish two distinctly different extension (i.e.  $\sigma_3$  principal stress) directions for early proto-Gulf and latest proto-Gulf time periods, the confidence of this distinction is not high. Confidence contours for P- and T-axes strongly overlap (Fig. DR2). A major limitation of this dataset is that rocks deposited during a large portion of proto-Gulf time ( $\sim 11.5$ – $7$  Ma) are not observed. Therefore, the kinematic data do not represent the tectonic style during a large portion of proto-Gulf time, and overall, these results should be taken with some level of reservation.

## REFERENCES CITED

- Allmendinger, R.W., Cardozo, N.C., and Fisher, D., 2012, *Structural Geology Algorithms: Vectors & Tensors*: Cambridge, England, Cambridge University Press, 289 p.
- Angelier, J., and Mechler, P., 1977, Sur une méthode graphique de recherche des contraintes principales également utilisable en tectonique et en séismologie: La méthode des dièdres droits: *Bulletin de la Société Géologique de France*, v. 7, p. 1309–1318.
- Angelier, J., Colletta, B., Chorowicz, J., Ortlieb, L., and Rangin, C., 1981, Fault tectonics of the Baja California Peninsula and the opening of the Sea of Cortez, Mexico: *Journal of Structural Geology*, v. 3, no. 4, p. 347–357, doi:10.1016/0191-8141(81)90035-3.
- Bott, M.H.P., 1959, The mechanics of oblique slip faulting: *Geological Magazine*, v. 96, p. 109–117.
- Marrett, R.A., and Allmendinger, R.W., 1990, Kinematic analysis of fault-slip data: *Journal of Structural Geology*, v. 12, p. 973–986.
- Pfiffner, O.A., and Burkhard, M., 1987, Determination of paleostress axes orientations from fault, twin and earthquake data: *Annales Tectonicae*, v. 1, p. 48–57.
- Wallace, R.E., 1951, Geometry of shearing stress and relation to faulting: *Journal of Geology*, v. 59, p. 118–130.
- Withjack, M.O., and Jamison, W.R., 1986, Deformation produced by oblique rifting: *Tectonophysics*, v. 126, p. 99–124, doi:10.1016/0040-1951(86)90222-2.

FIGURE DR1. (A) Fault Dip vs. Rake for all measured fault striae. (B) Fault Strike vs. Rake for all measured fault striae. See Table DR1 for a list of all measured fault striae.

FIGURE DR2. Fault kinematic data of slickenlines and mullions observed in coastal Sonora study area. Columns display (left) measured faults and striae, (left-center) P-axes (gray circles) and T-axes (black squares) for individual fault measurements, (right-center) Kamb contour of P-axes (gray) and T-axes (black), and (right) fault plane solution. All analysis conducted with FaultKin software (Marrett and Allmendinger, 1990; Allmendinger et al., 2012). (A) Kinematic data from pre-12.5 Ma rocks. (B) Kinematic data from rift-related (post-12.5 Ma) rocks. These rift-related fault data are further subdivided into faults measured in early proto-Gulf-age rocks (C) and in latest proto-Gulf-age rocks (D). It is assumed that the faults formed prior to rotation, which may be invalid. All fault kinematic data plotted here were first rotated counter-clockwise about a vertical-axis by the amount of rotation either determined by the paleomagnetic results of this study (up to  $53^{\circ}$ ).

**FIGURE DR1**

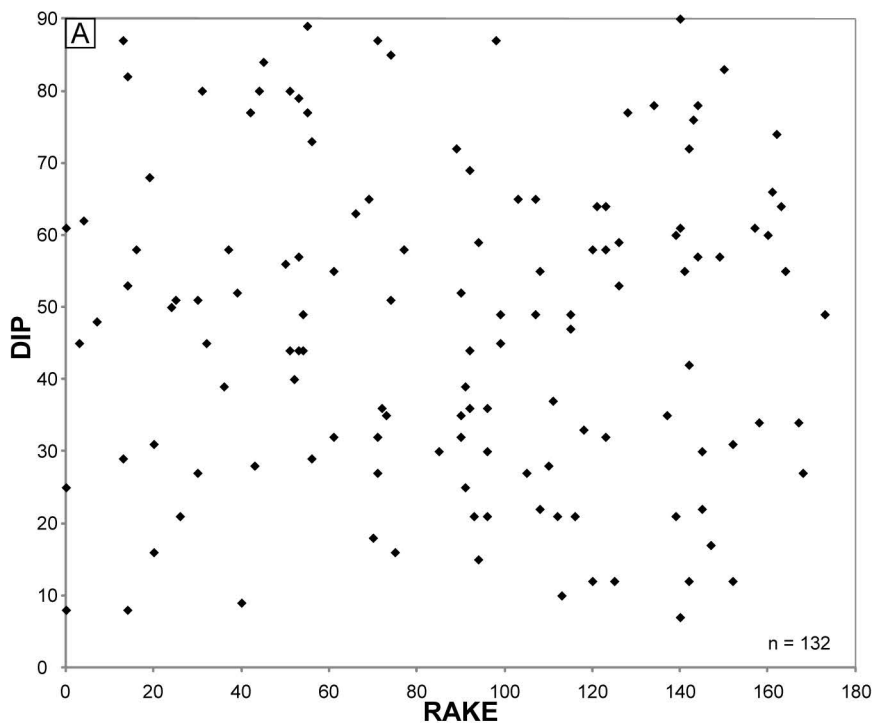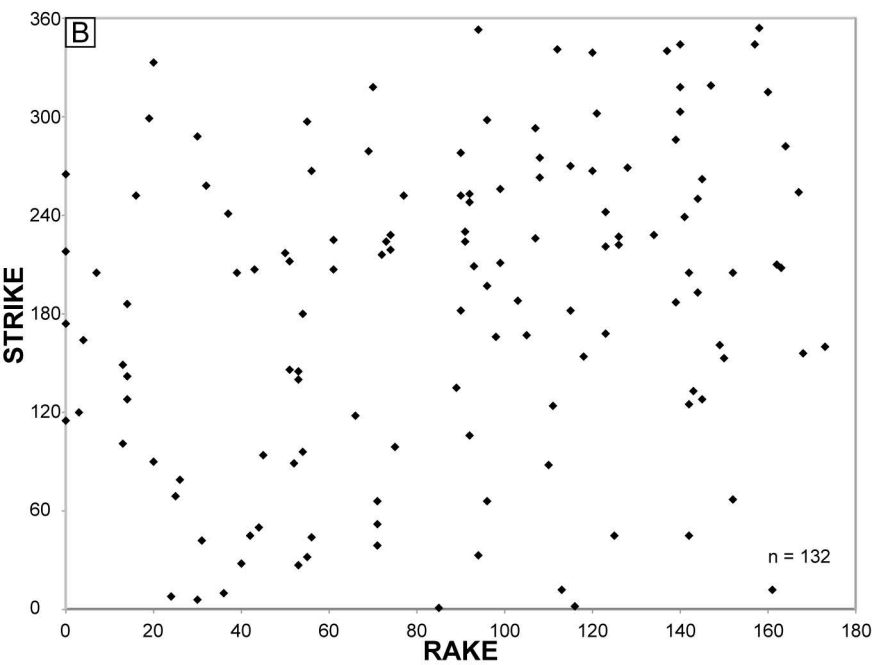

**FIGURE DR2**

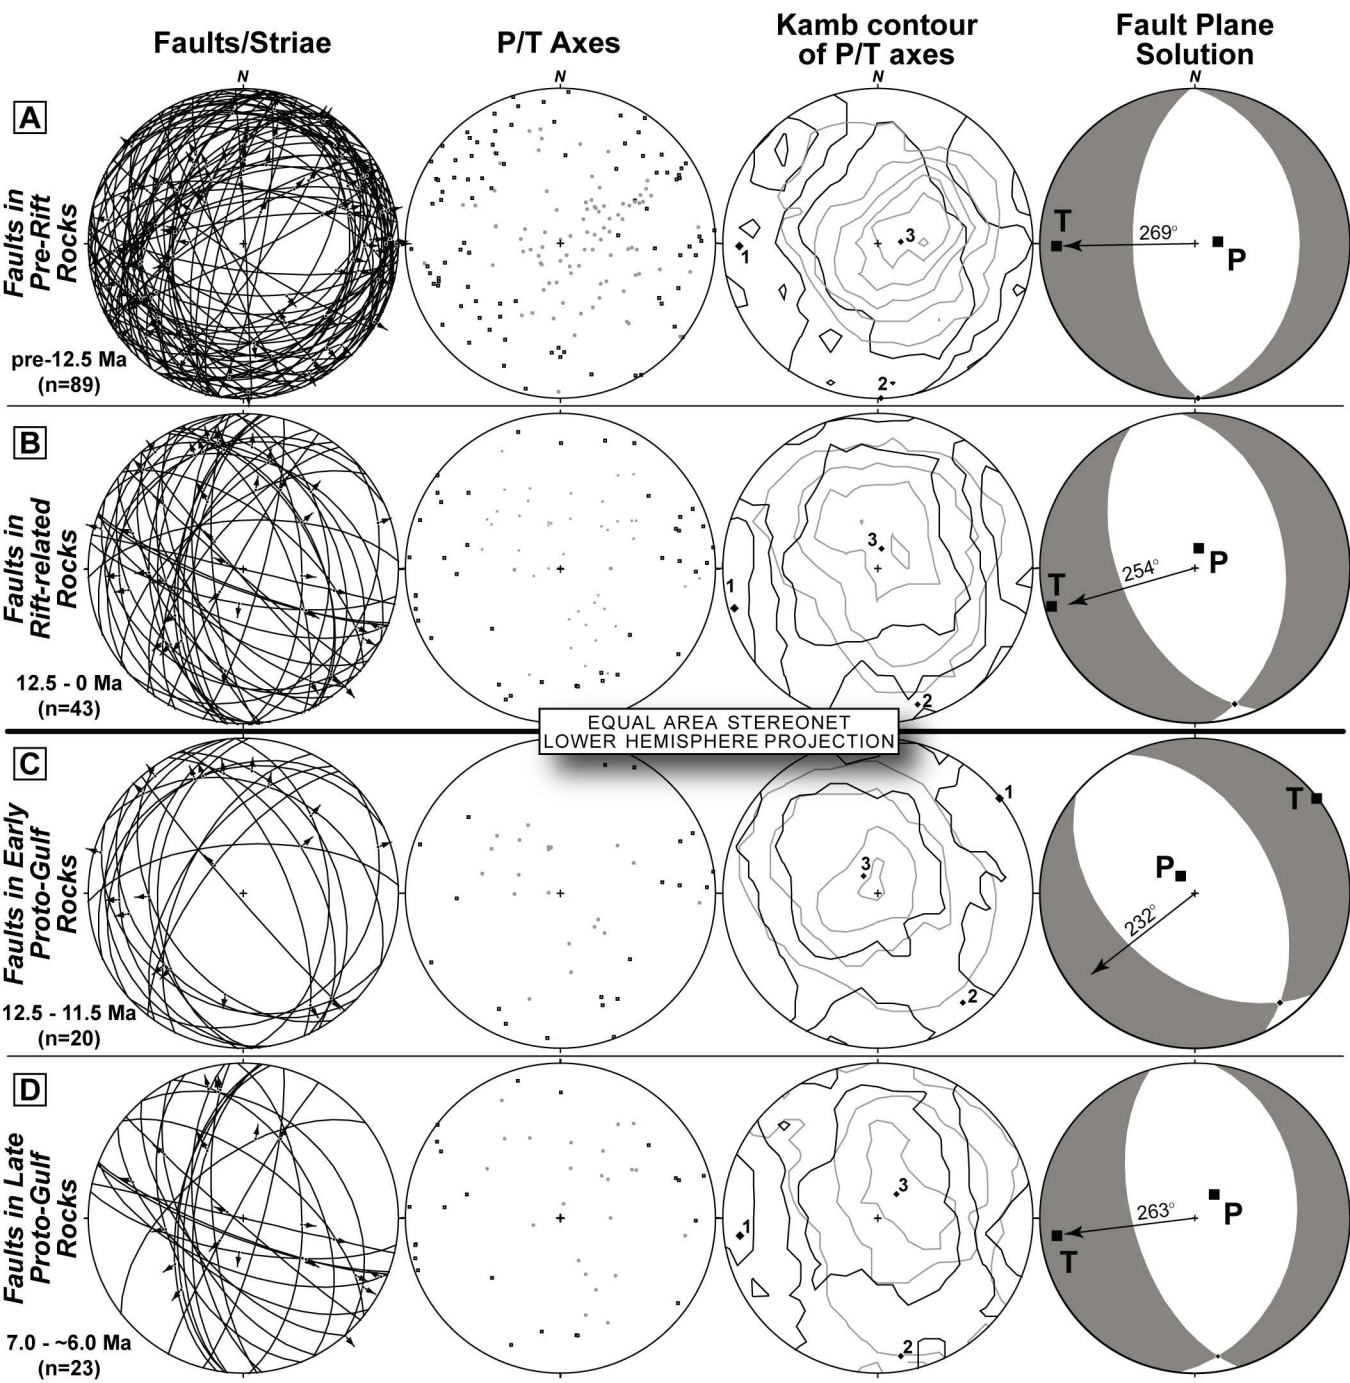

TABLE DR1. Fault kinematic data measured in the study area.

| Map Unit | Strike | Dip | Rake | Sense of Slip  | Map Unit | Strike | Dip | Rake | Sense of Slip    |
|----------|--------|-----|------|----------------|----------|--------|-----|------|------------------|
| Tcu      | 050    | 80  | 44   | ND             | Tvu      | 341    | 21  | 112  | ND               |
| Tcu      | 164    | 62  | 4    | dextral        | Tvu      | 115    | 25  | 0    | ND               |
| Tcu      | 208    | 64  | 163  | ND             | Tvu      | 090    | 16  | 20   | ND               |
| Tcu      | 222    | 59  | 126  | ND             | Tvu      | 052    | 87  | 71   | ND               |
| Tcu      | 221    | 64  | 123  | ND             | Tvu      | 340    | 35  | 137  | ND               |
| Tcu      | 211    | 49  | 99   | normal         | Tvu      | 002    | 21  | 116  | ND               |
| Tcu      | 166    | 87  | 98   | ND             | Tvu      | 205    | 48  | 7    | ND               |
| Tcu      | 187    | 60  | 139  | ND             | Tvu      | 193    | 78  | 144  | ND               |
| Tcu      | 174    | 61  | 0    | ND             | Tvu      | 254    | 34  | 167  | ND               |
| Tcu      | 217    | 56  | 50   | normal         | Tvu      | 265    | 8   | 0    | ND               |
| Tcu      | 145    | 79  | 53   | ND             | Tvu      | 315    | 60  | 160  | ND               |
| Tcu      | 033    | 59  | 94   | ND             | Tvu      | 182    | 32  | 90   | ND               |
| Tcu      | 161    | 57  | 149  | ND             | Tvu      | 066    | 30  | 96   | ND               |
| Tcu      | 008    | 50  | 24   | ND             | Tvu      | 167    | 27  | 105  | ND               |
| Tcu      | 225    | 55  | 61   | ND             | Tvu      | 099    | 16  | 75   | ND               |
| Tcu      | 210    | 74  | 162  | ND             | Tvu      | 303    | 61  | 140  | ND               |
| Tcu      | 146    | 80  | 51   | ND             | Tvu      | 293    | 49  | 107  | ND               |
| Tcu      | 344    | 61  | 157  | ND             | Tvu      | 042    | 80  | 31   | ND               |
| Tcu      | 135    | 72  | 89   | ND             | Tvu      | 154    | 33  | 118  | ND               |
| Tcu      | 318    | 90  | 140  | ND             | Tvu      | 252    | 35  | 90   | ND               |
| Tcu      | 354    | 34  | 158  | ND             | Tvu      | 262    | 22  | 145  | ND               |
| Ttmc     | 219    | 85  | 74   | ND             | Tvu      | 226    | 65  | 107  | ND               |
| Ttsf     | 302    | 64  | 121  | normal/dextral | Tvu      | 228    | 78  | 134  | ND               |
| Ttsf     | 010    | 39  | 36   | ND             | Tvu      | 120    | 45  | 3    | ND               |
| Ttsf     | 333    | 31  | 20   | ND             | Tvu      | 096    | 49  | 54   | ND               |
| Ttsf     | 241    | 58  | 37   | ND             | Tvu      | 224    | 35  | 73   | normal/sinistral |
| Ttsf     | 250    | 57  | 144  | ND             | Tvu      | 207    | 32  | 61   | normal/sinistral |
| Ttsf     | 149    | 87  | 13   | ND             | Tvu      | 339    | 12  | 120  | normal/dextral   |
| Ttsf     | 079    | 21  | 26   | ND             | Tvu      | 001    | 30  | 85   | ND               |
| Ttsf     | 168    | 32  | 123  | ND             | Tvu      | 319    | 17  | 147  | ND               |
| Ttsf     | 156    | 27  | 168  | ND             | Tvu      | 227    | 53  | 126  | ND               |
| Ttsf     | 209    | 21  | 93   | ND             | Tvu      | 353    | 15  | 94   | ND               |
| Ttsf     | 205    | 12  | 152  | ND             | Tvu      | 133    | 76  | 143  | ND               |
| Ttsf     | 253    | 69  | 92   | normal         | Tvu      | 067    | 31  | 152  | ND               |
| Ttsf     | 6      | 51  | 30   | ND             | Tvu      | 069    | 51  | 25   | ND               |
| Ttsf     | 212    | 44  | 51   | ND             | Tvu      | 242    | 58  | 123  | ND               |
| Ttsf     | 012    | 66  | 161  | ND             | Tvu      | 128    | 53  | 14   | ND               |
| Tvln     | 27     | 44  | 53   | normal         | Tvu      | 066    | 27  | 71   | ND               |
| Tvls     | 180    | 44  | 54   | ND             | Tvu      | 248    | 44  | 92   | ND               |
| Tvls     | 263    | 22  | 108  | ND             | Tvu      | 282    | 55  | 164  | ND               |
| Tvls     | 298    | 21  | 96   | ND             | Tvu      | 318    | 18  | 70   | ND               |
| Tvls     | 230    | 39  | 91   | ND             | Kg       | 228    | 51  | 74   | normal           |
| Tvs      | 088    | 28  | 110  | ND             | Kg       | 299    | 68  | 19   | ND               |
| Tvs      | 270    | 49  | 115  | ND             | Kg       | 94     | 84  | 45   | normal           |
| Tvs      | 267    | 58  | 120  | ND             | Kg       | 153    | 83  | 150  | ND               |
| Tvs      | 239    | 55  | 141  | ND             | Kt dike  | 045    | 77  | 42   | ND               |
| Tvs      | 258    | 45  | 32   | ND             | Kt dike  | 205    | 72  | 142  | ND               |
| Tvu      | 32     | 89  | 55   | ND             | Kt       | 279    | 65  | 69   | normal           |
| Tvu      | 297    | 77  | 55   | ND             | Kt       | 106    | 36  | 92   | normal           |
| Tvu      | 142    | 8   | 14   | ND             | Kt       | 101    | 29  | 13   | dextral          |
| Tvu      | 288    | 27  | 30   | ND             | Kt       | 118    | 63  | 66   | ND               |
| Tvu      | 344    | 7   | 140  | ND             | Kt       | 218    | 25  | 0    | sinistral        |
| Tvu      | 028    | 9   | 40   | ND             | Kt       | 216    | 36  | 72   | normal           |
| Tvu      | 045    | 12  | 125  | ND             | Kt       | 140    | 57  | 53   | thrust?          |
| Tvu      | 045    | 12  | 142  | ND             | Kt       | 286    | 21  | 139  | normal           |
| Tvu      | 188    | 65  | 103  | ND             | Kt       | 160    | 49  | 173  | dextral          |
| Tvu      | 089    | 40  | 52   | ND             | Kt       | 205    | 52  | 39   | normal           |
| Tvu      | 039    | 32  | 71   | ND             | Kt       | 128    | 30  | 145  | normal           |
| Tvu      | 044    | 29  | 56   | ND             | Kt       | 124    | 37  | 111  | normal           |
| Tvu      | 125    | 42  | 142  | ND             | Kt       | 256    | 45  | 99   | normal           |
| Tvu      | 252    | 58  | 77   | ND             | Kt       | 267    | 73  | 56   | normal           |
| Tvu      | 252    | 58  | 16   | ND             | Kt       | 182    | 47  | 115  | ND               |
| Tvu      | 012    | 10  | 113  | ND             | Kt       | 224    | 25  | 91   | ND               |
| Tvu      | 269    | 77  | 128  | normal/dextral | Kt       | 186    | 82  | 14   | ND               |
| Tvu      | 275    | 55  | 108  | ND             | Kt       | 207    | 28  | 43   | ND               |
| Tvu      | 278    | 52  | 90   | ND             | Pziu     | 197    | 36  | 96   | ND               |

'ND' indicates a fault striae measurement where the sense of fault slip motion was not determinable.
